# Supplementary material for: Associations of Greenness, Parks, and Blue Space With Neurodegenerative Disease Hospitalizations Among Older US Adults
Source: PubMed Central journal article supplement (PMC9856892; doi:10.1001/jamanetworkopen.2022.47664), 2022-12-20
Supplement: jamanetwopen-e2247664-s002.pdf [file jamanetwopen-e2247664-s002.pdf]

## Data Sharing Statement

Klompaker. Associations of Greenness, Parks, and Blue Space With Neurodegenerative Disease Hospitalizations Among Older US Adults. *JAMA Netw Open*. Published December 20, 2022. doi:10.1001/jamanetworkopen.2022.47664

### Data

**Data available:** No
